# Supplementary material for: Tumor-associated macrophage enhances PD-L1-mediated immune escape of bladder cancer through PKM2 dimer/STAT3 complex nuclear translocation
Source: Research Square preprint supplement (doi:10.21203/rs.3.rs-3737302/v1), 2023-12-20
Supplement: Supplementary file 1 [file 32a860f8bad85906f90a455a.docx]

**BLCA organoid model**

Sample processing method: Surgically resected fresh tissue from BLCA tissues was cryotransported (2-8°C) to the laboratory within 6 hours. After the tissue samples were washed using sample washing solution (precooled PBS + penicillin + streptomycin + amphotericin B), the samples were cut into small pieces of 1-3 mm3 and then placed in a chamber containing enzymatic solution (Advanced DMEM/F12 (Thermo Fisher Scientific) + 1 mg/mL type I collagenase (Thermo Fisher Scientific)) in a 15 mL centrifuge tube for 1 h (37°C). After completion of the enzymatic digestion, the supernatant was aspirated into 15 mL tubes, centrifuged to remove the supernatant, and centrifuged again to remove erythrocytes by using erythrocyte lysate (Beyotime). The supernatant was removed, an appropriate volume of precooled Matrigel (Corning) was added for mixing, and the plates were seeded at 45 μL/well into prewarmed 24-well plates and placed in a cell culture incubator at 37°C. After 40 min, organoid medium was added, and the medium was replaced with new medium every 2 days. The following organoid medium formulations were modified from a previous study: Advanced DMEM/F12 (Thermo Fisher Scientific), B27 (2%, Thermo Fisher Scientific), N2 (1%,Thermo Fisher Scientific), Glutamax (1X,Thermo Fisher Scientific), HEPES (10 mM, Thermo Fisher Scientific), Nicotinaminde (10 mM, Sigma-Aldrich), N-acetylcysteine (1.25mM, Sigma-Aldrich), antibiotics (1X penicillin-streptomycin-amphotericin B; Solarbio), recombinant human epidermal growth factor (hEGF; 50 ng/ml, OrganRegen), recombinant human fibroblast growth factor (hFGF)-10 (100 ng/ml, OrganRegen), hFGF-2 (12.5 ng/ml, OrganRegen), hFGF7(25 ng/ml, OrganRegen), Noggin (100 ng/ml, OrganRegen), R-spondin 1 (500 ng/ml, OrganRegen), A-83-01 (5μM, MCE) and Y27632 (10 μM, MCE).

Drug sensitivity testing of organoids: Organoids were obtained from Matrigel matrix gel, and oversized patient-derived organoids (PDOs) were removed by passing them through a 100 μm cell filter. After counting, the PDOs were resuspended in Matrigel matrix gel at a concentration of 20 PDOs/μL and inoculated into preheated 96-well plates at 5 μL/well (100 PDOs/well). The plates were incubated in a cell culture incubator at 37°C and 5% CO2 for 20 min to solidify the matrix gel. The matrix gel was then covered with 100 μL of complete organoid medium. After overnight incubation, the initial fluorescence values of the organoids were obtained by detecting organoid activity using CellTiter-Blue (Promega) cell activity detection reagent and an enzyme marker (Synergy H1). Then, the old medium was replaced with fresh medium containing different concentrations of drugs for drug incubation, the organoid activity was detected again after 24, 48, and 72 h of drug treatment, and the inhibitory effect of the drugs on tumor proliferation was evaluated by calculating the proliferation efficiency of the organoids.
