# Supplementary material for: Tumor-associated macrophage enhances PD-L1-mediated immune escape of bladder cancer through PKM2 dimer/STAT3 complex nuclear translocation
Source: Research Square preprint supplement (doi:10.21203/rs.3.rs-3737302/v1), 2023-12-20
Supplement: Supplementary file 2 [file 4c4e18221f0e8dfc0235933d.docx]

Supplementary Fig. 1


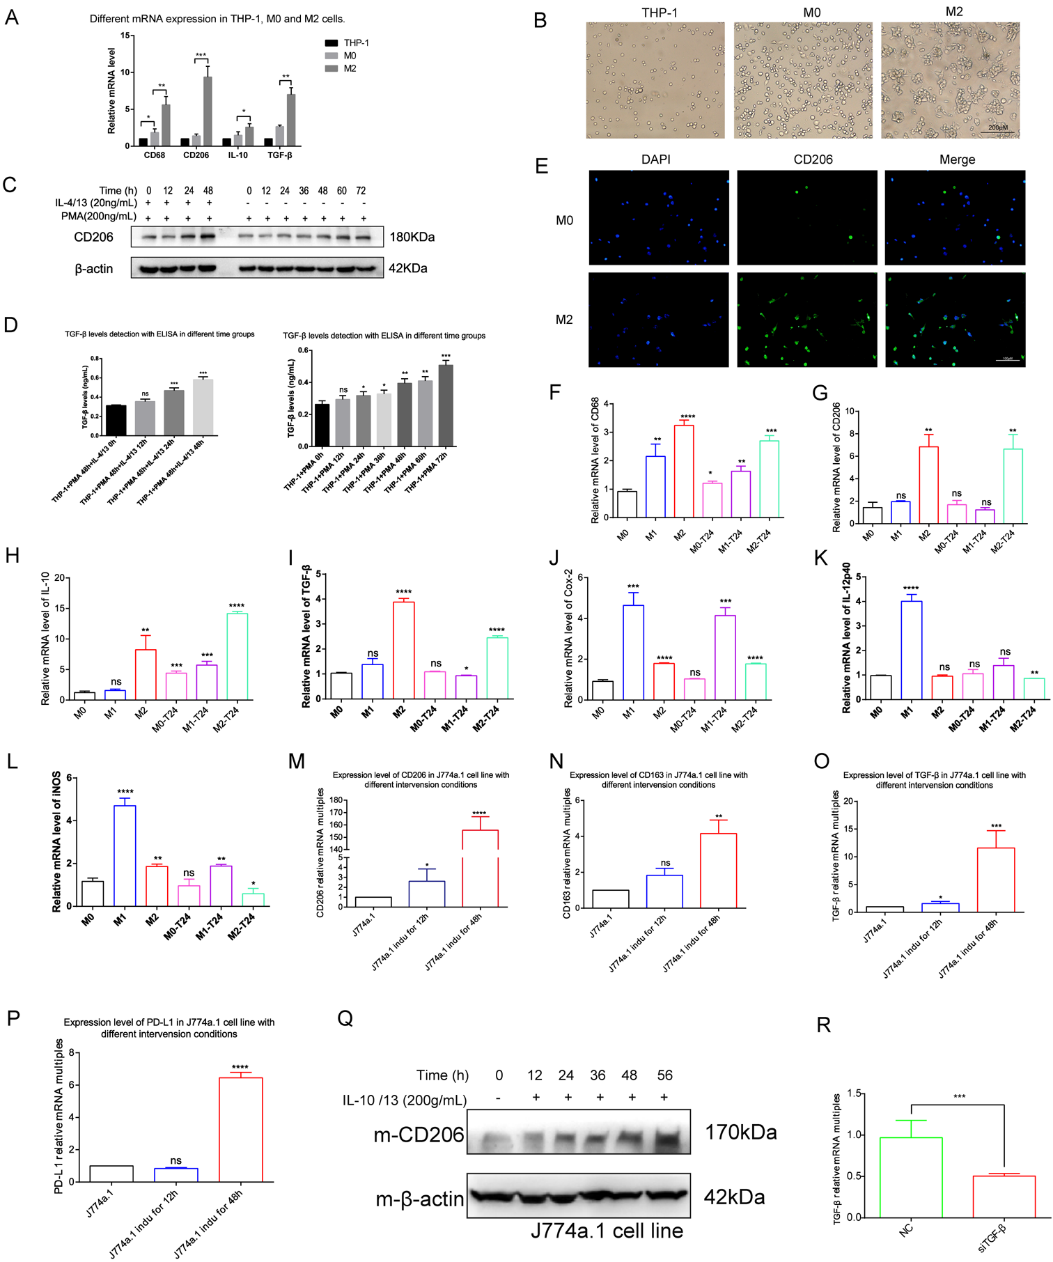


**Supplementary Fig. S1. Induction and characterisation of M2-TAMs of human and murine origin.**

(A) RT-qPCR detection of CD68, CD206, IL-10, TGF-β expression in human THP-1-induced macrophages M0 and M2. (B) Morphological changes induced by THP-1 to M0 and M2-TAMs observed under light microscope. (C) and (D) Expression of CD206 was detected by Western Blot and TGF-β secretion levels by ELISA after THP-1 was induced to M2-TAMs by PMA with or without IL-4/13 at different times. (E) Immunofluorescence detection of fluorescent expression of CD206 in M2-TAMs derived from THP-1-induced. (F) (G) (H) (I) (J) (K) (L) RT-qPCR detection of mRNA expression levels of CD68, CD206, IL-10, TGF-β, COX-2, IL-12p40, iNOS in different subtypes of human macrophages. (M) (N) (O) (P) RT-qPCR detection for the mRNA expression of CD206, CD163, TGF-β and PD-L1 in mouse J774a.1 cells and its induced macrophages. (Q) Western Blot detection of CD206 expression levels after different times induction of J774a.1. (R) RT-qPCR detection of small interfering RNA inhibition efficiency of TGF-β in M2-TAMs. Differences between the means were considered to be significant at P<0.05 by using Student multiple T comparison tests; *P < 0.05, **P <0.01, and ***P < 0.001, ****P < 0.0001 compared with the control cells.


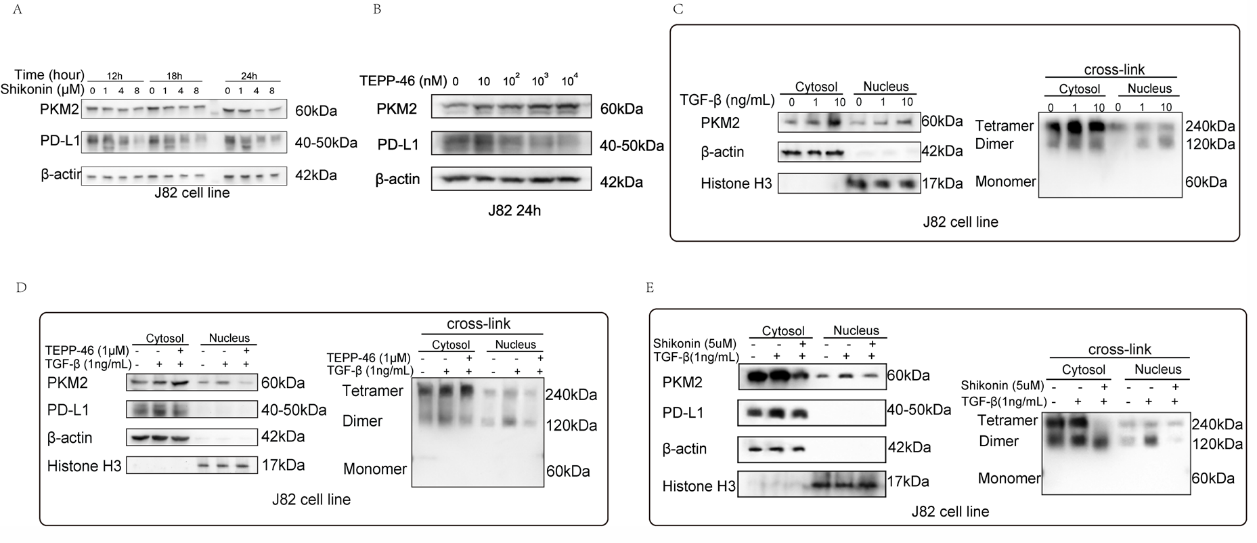


**Supplementary Fig. S2**(A) Western Blot detection for protein expression of PKM2 and PD-L1 in J82 cells after gradient concentrations of shikonin at 12, 18 and 24h. (B) Western Blot detection of PKM2 and PD-L1 protein expression in J82 cells after treatment with gradient concentrations of TEPP-46 for 24h. (C) Western Blot detection of PKM2 and PD-L protein expression in the crosslink proteins of cytosol and nucleus in J82 after treatment with TGF-β 1ng/mL and 10ng/mL for 24h. (D) Western Blot detection of PKM2 expression in the crosslink proteins of cytosol and nucleus in J82 cells after treatment with TGF-β/TEPP-46 for 24h. (E) Western Blot detection of PKM2 and PD-L1 protein expression in the crosslink proteins of cytosol and nucleus in J82 cells after treatment with TGF-β/shikonin for 24h.
